# Supplementary material
Source: PubMed Central journal article supplement (PMC8175607)
Supplement: 11606_2021_6650_MOESM1_ESM.pdf [file 11606_2021_6650_MOESM1_ESM.pdf]

**Supplemental Figure:** Specialties that demonstrated significant increases in Black or Hispanic residents and when they are projected to achieve representation proportional to the US population.

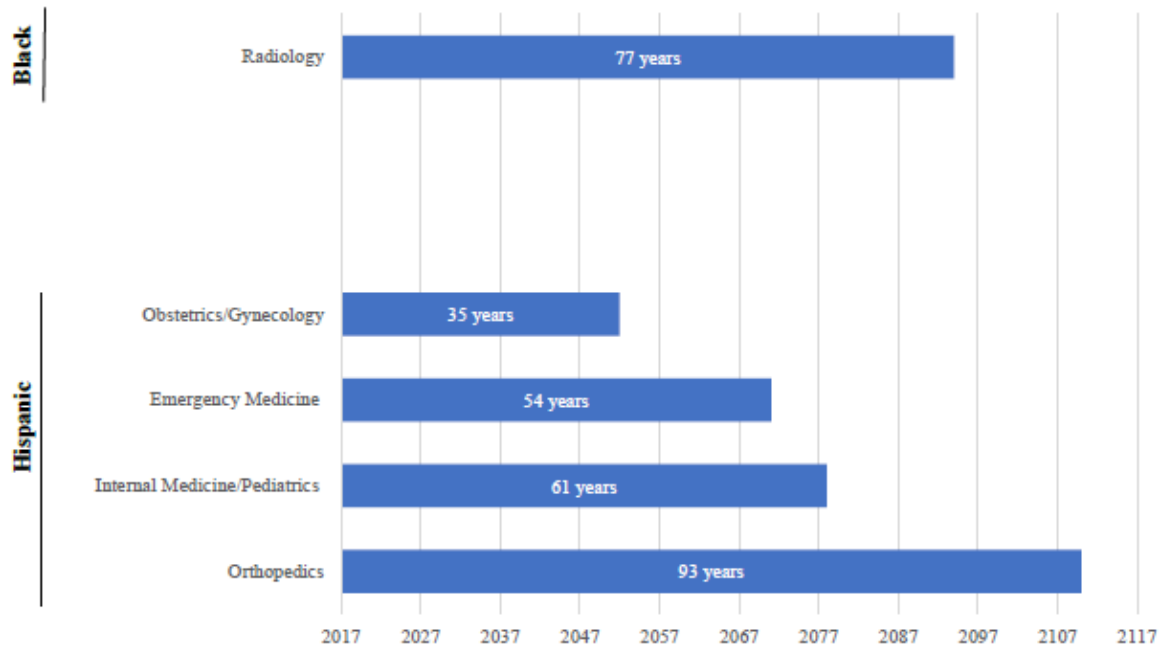

**Legend:** The projected time in years before these specialties achieve proportional representation Black (top) or Hispanic (bottom) comparable to that of recent US population estimates. The x-axis lists actual years and numbers embedded within the graph represent how many years from the 2017-2018 academic year.
